# Supplementary material for: Nanoscale light–matter interactions in metal–organic frameworks cladding optical fibers
Source: Royal Society of Chemistry journal article supplement (doi:10.1039/c9nr09061d), 2020-01-01
Supplement: c9nr09061d1.pdf [file c9nr09061d1.pdf]

Supplementary Information for

**Nanoscale light-matter interactions in metal-organic frameworks  
cladding optical fibers**

Jieyun Wu\*, Wanying Zhang, Ying Wang\*, Binghui Li, Ting Hao, Youbin Zheng, Lianzhong Jiang, Kaixin Chen, Kin Seng Chiang\*

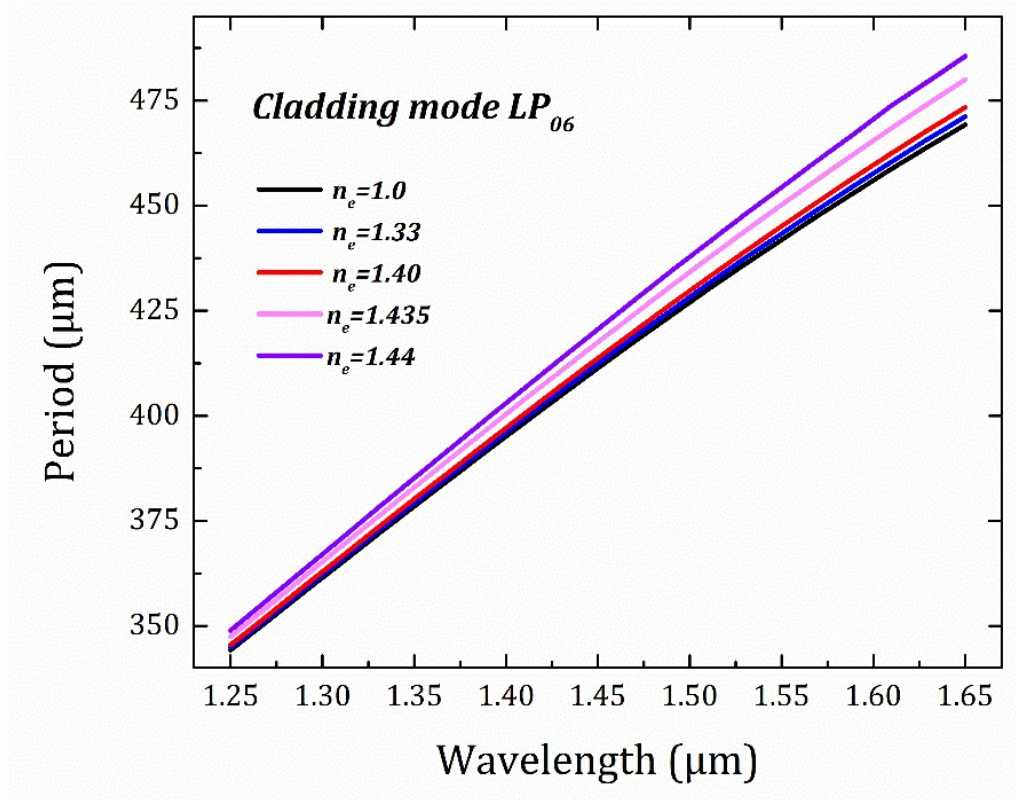

Figure S1. Simulation of cladding mode  $LP_{06}$  for refractive index sensing.

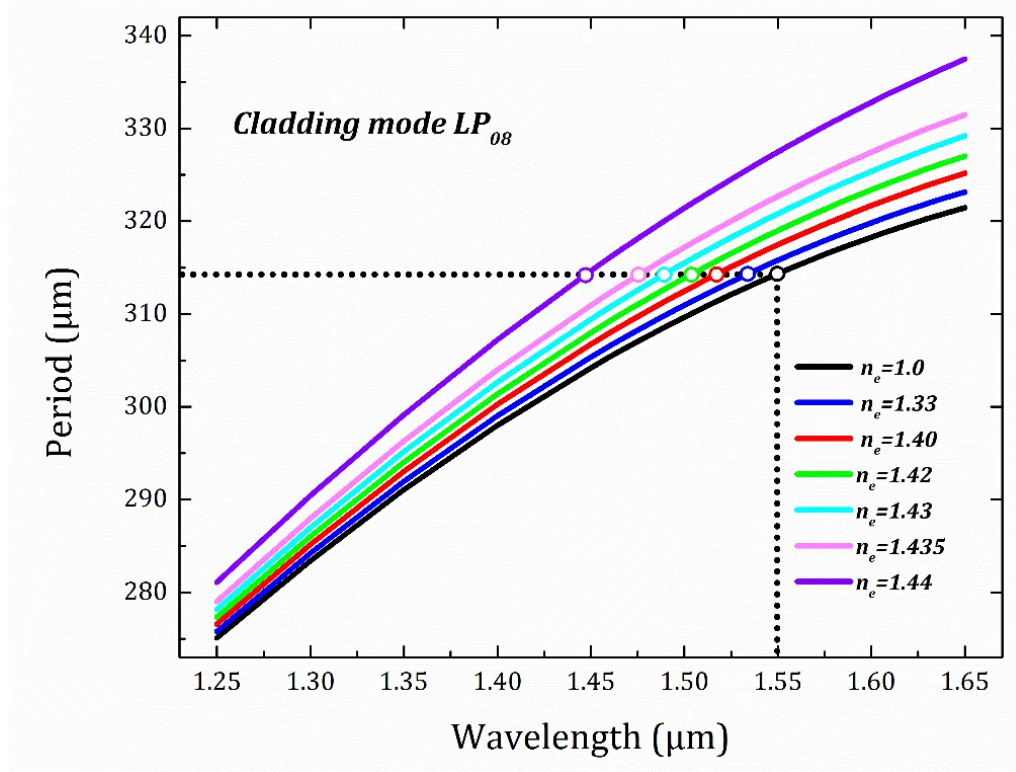

Figure S2. Simulation of cladding mode  $LP_{08}$  for refractive index sensing.

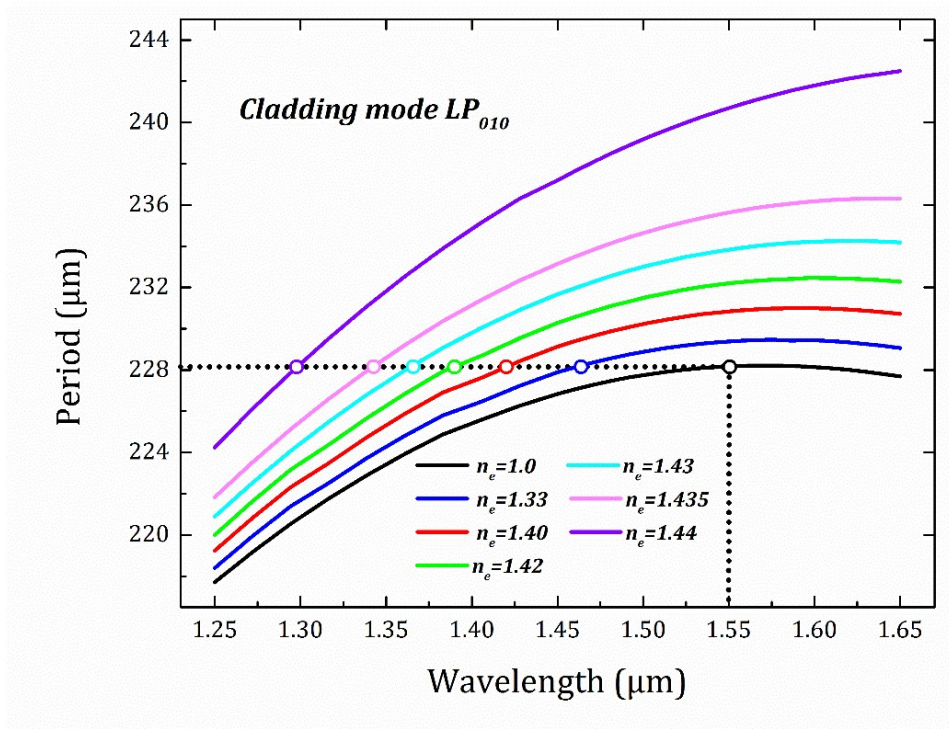

Figure S3. Simulation of cladding mode  $LP_{10}$  for refractive index sensing.

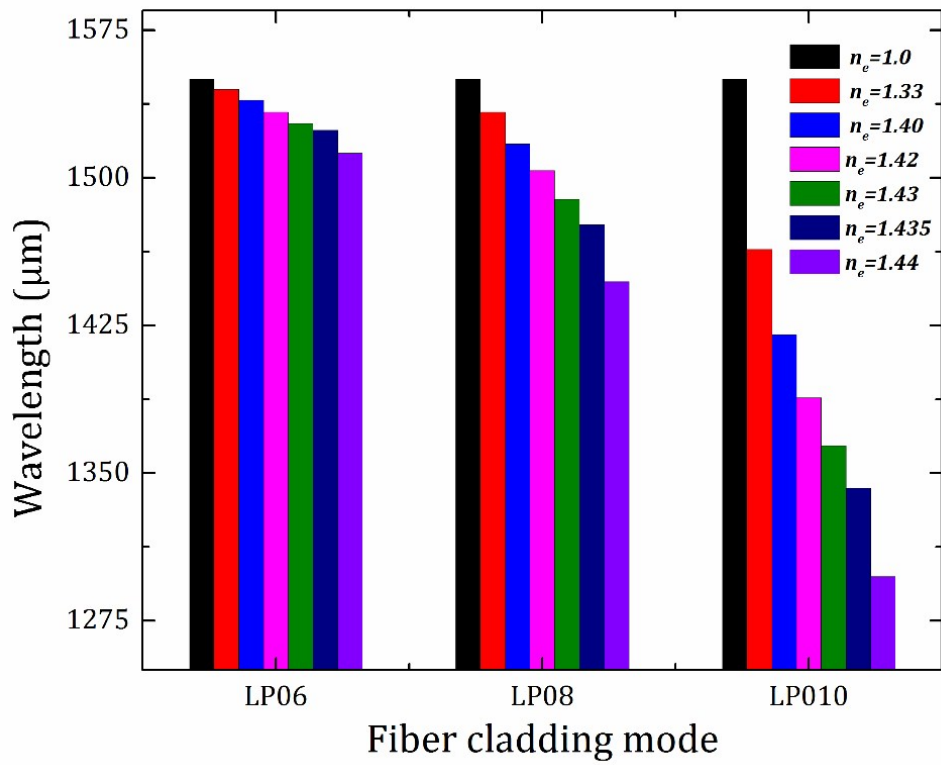

Figure S4. Comparison of central wavelength shift of LPFG in response to external refractive index changes.



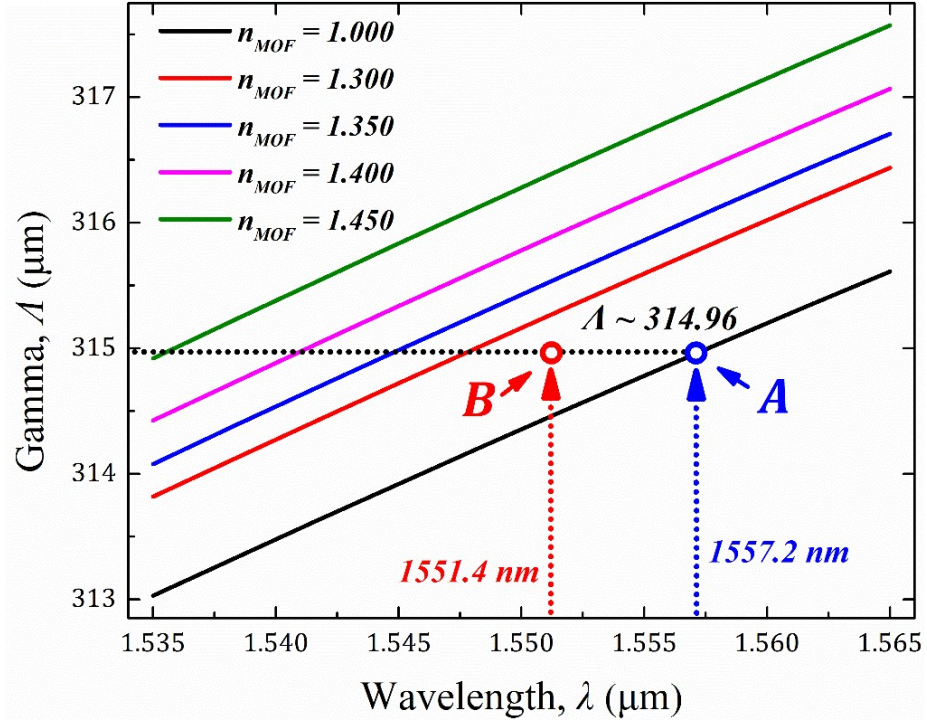

Figure S5. Calculation of the period of LPFG according to the central wavelength shifts in MZI.

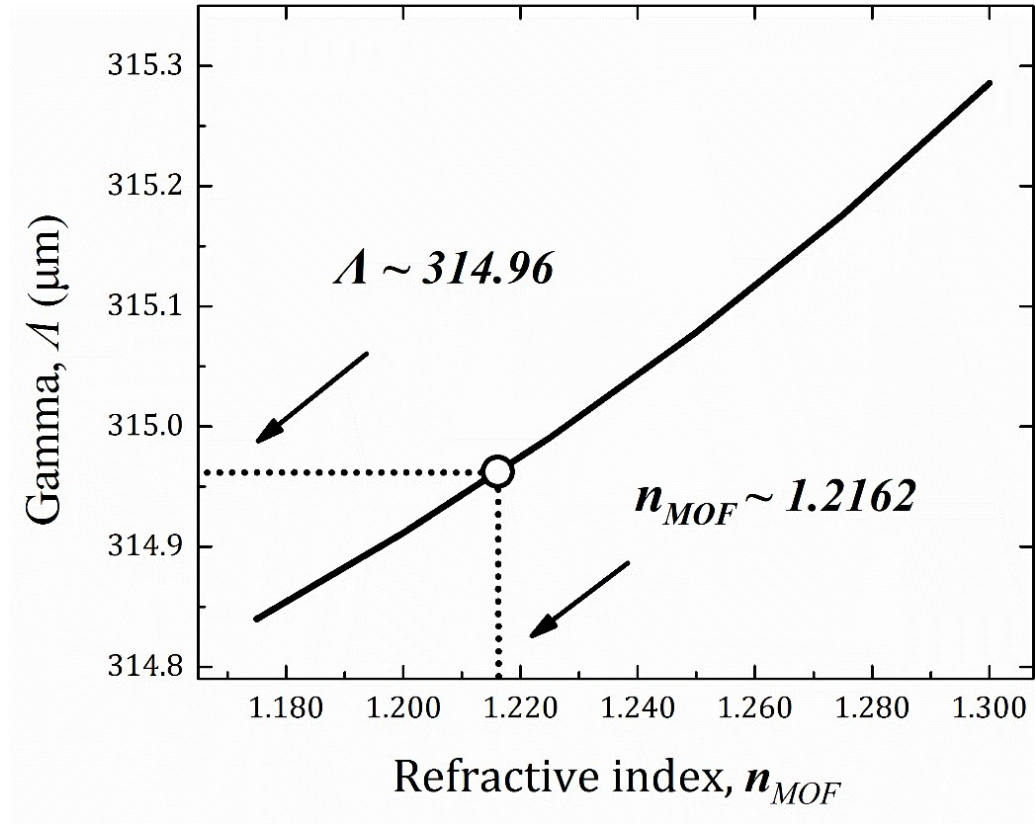

Figure S6. Calculated refractive index of 300 nm-thick ZIF-8.

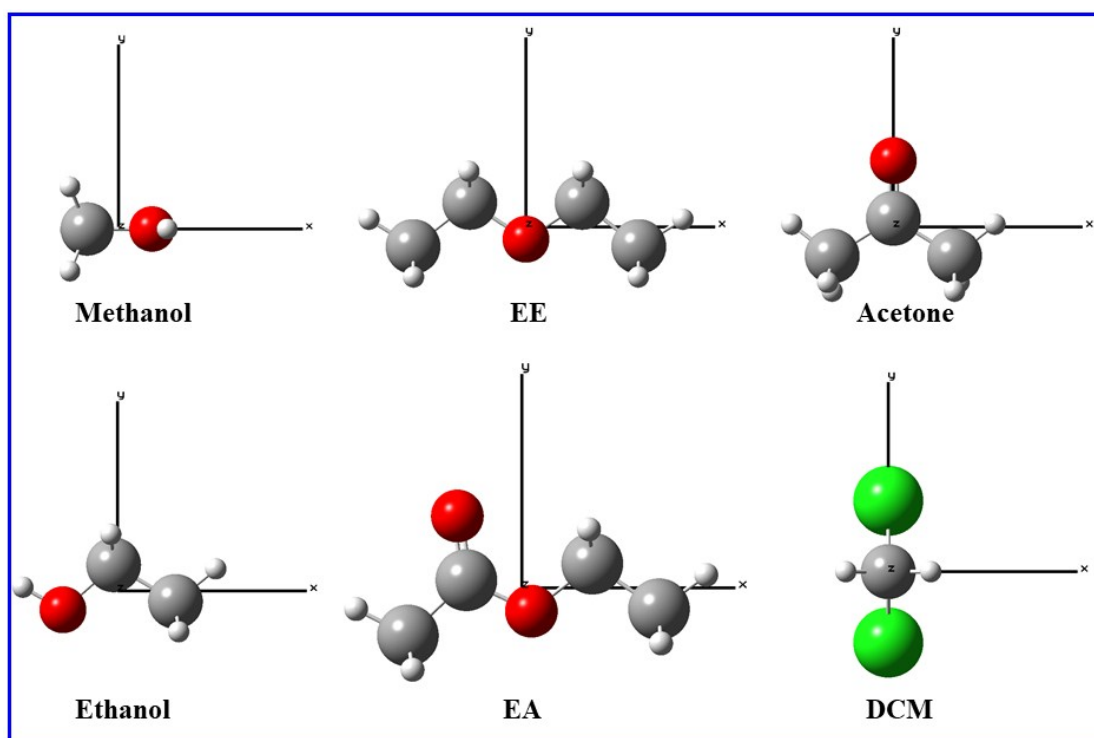

Figure S7. Optimized Guest gas molecules from DFT calculations.

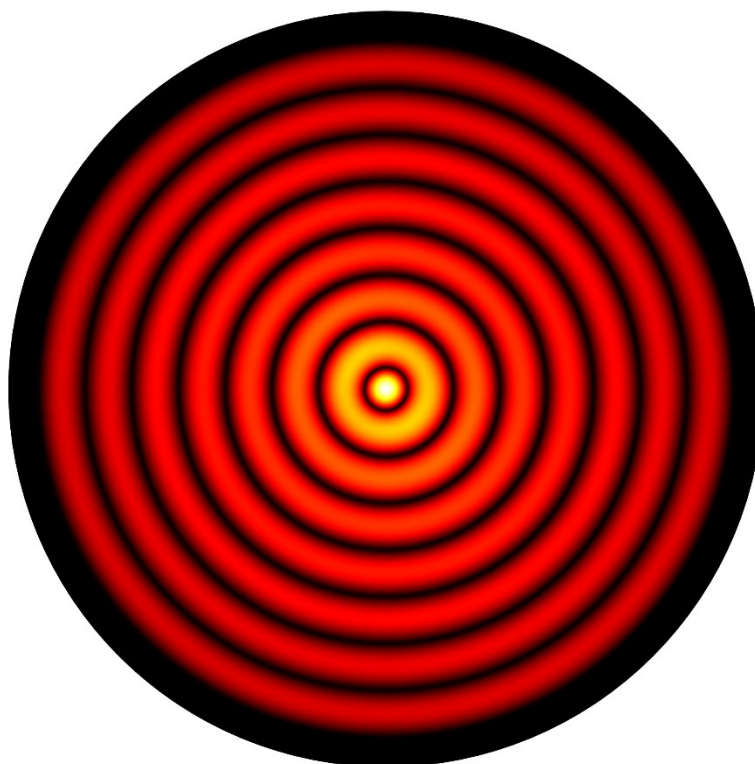

Figure S8. Electric-field distribution of cladding mode LP<sub>08</sub> after methanol adsorption

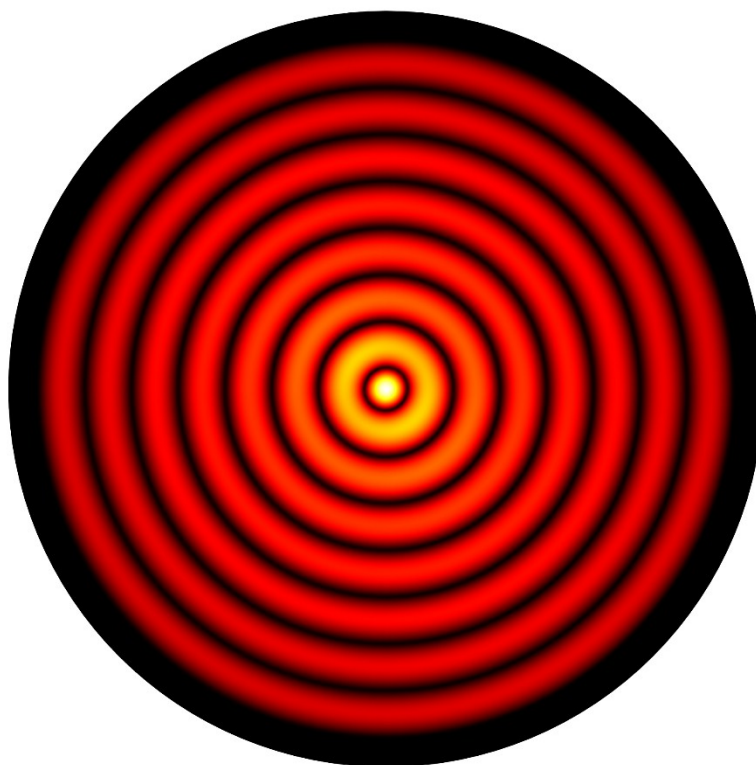

Figure S9. Electric-field distribution of cladding mode LP<sub>08</sub> after ethanol adsorption

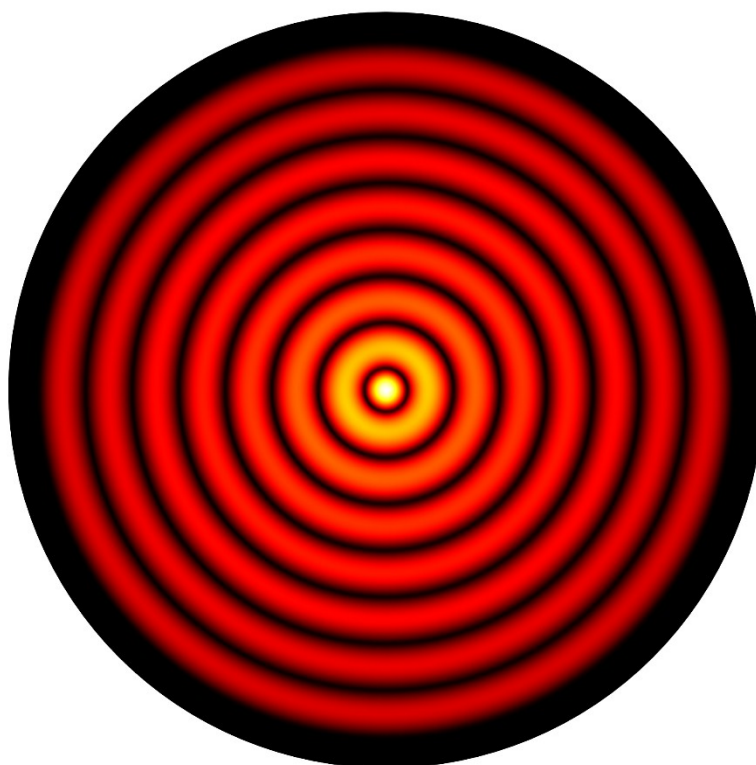

Figure S10. Electric-field distribution of cladding mode LP<sub>08</sub> after acetone adsorption

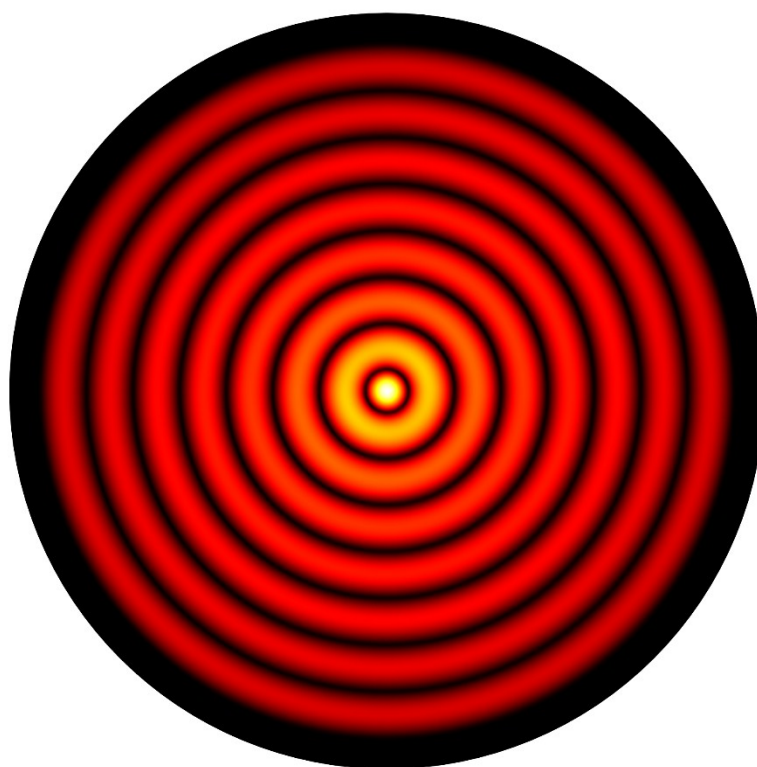

Figure S11. Electric-field distribution of cladding mode LP<sub>08</sub> after EE adsorption

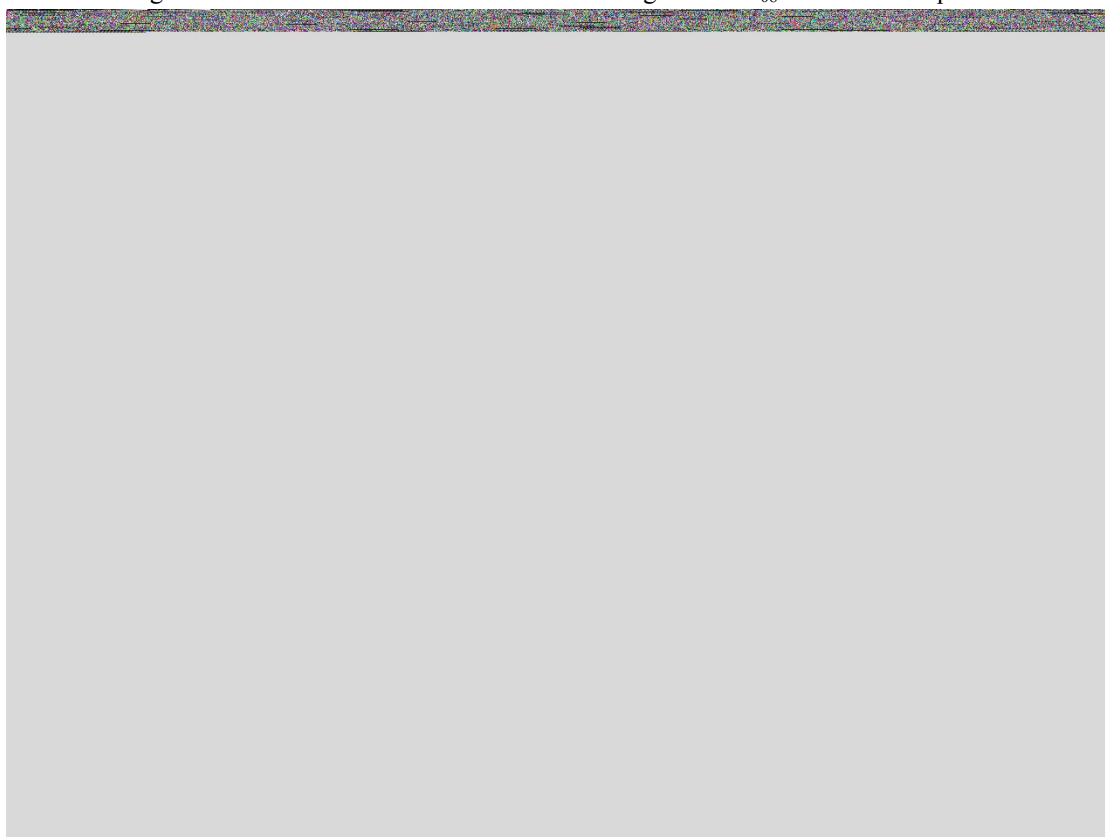

Figure S12. Electric-field distribution of cladding mode LP<sub>08</sub> after EA adsorption



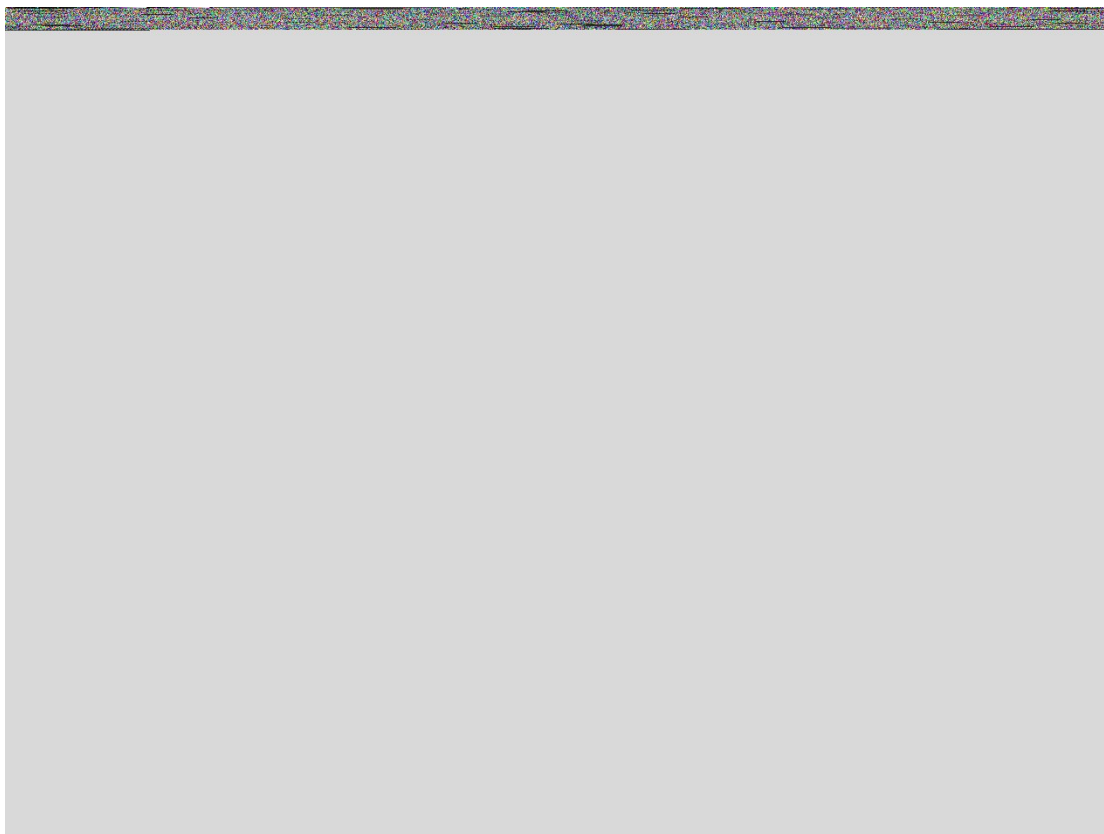

Figure S13. Electric-field distribution of cladding mode  $LP_{08}$  after DCM adsorption

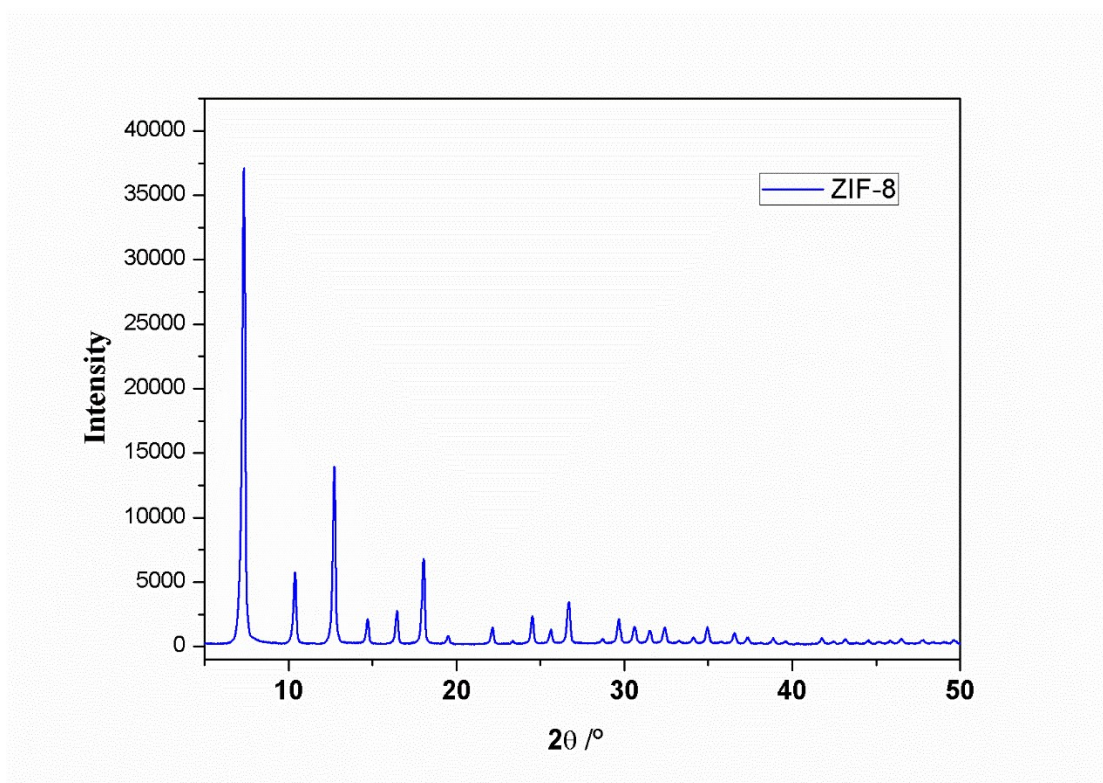

Figure S14. Powder XRD of ZIF-8
